# Supplementary material
Source: PubMed Central journal article supplement (PMC3791055)
Supplement: Supp_Table1.pdf [file Supp_Table1.pdf]

SUPPLEMENTARY TABLE S1. (CONTINUED)

|                                   | Male                |                     |                     |                     |                     |                     |                     |                     |                     |                     |                     |                     | Significance level for main effects as analyzed by a full factorial three-way general linear model (F(1,48))* |                     |         |         |         |         |         |       |         |         |
|-----------------------------------|---------------------|---------------------|---------------------|---------------------|---------------------|---------------------|---------------------|---------------------|---------------------|---------------------|---------------------|---------------------|---------------------------------------------------------------------------------------------------------------|---------------------|---------|---------|---------|---------|---------|-------|---------|---------|
|                                   | Female              |                     |                     |                     |                     |                     | Male                |                     |                     |                     |                     |                     |                                                                                                               |                     |         |         |         |         |         |       |         |         |
|                                   | - Taurine diet      |                     |                     | + Taurine diet      |                     |                     | - Taurine diet      |                     |                     | + Taurine diet      |                     |                     |                                                                                                               |                     |         |         |         |         |         |       |         |         |
|                                   | W                   | N-F                 | Null                | W                   | W+F                 | Null                | W                   | W-M                 | Null                | N-M                 | W                   | W+M                 | Null                                                                                                          | N+M                 | G       | D       | S       | G×D     | G×S     | D×S   | G×S×D   |         |
| Kidney glycine (nmol/g)           | 1564±143c           | 2574±173b           | 1597±43c            | 2211±292bc          | 10938±825a          | 10322±917a          | 2764±126b           | 4329±242a           | 2868±445b           | 11266±917ab         | 10820±655a          | 2603±136b           | 2603±136b                                                                                                     | 2603±136b           | <0.0005 | <0.0001 | <0.0001 | <0.0001 | <0.0001 | <0.05 | <0.005  | <0.0001 |
| Kidney alanine (nmol/g)           | 1410±103ab          | 1338±86ab           | 1152±79b            | 1186±82ab           | 2.4±0.4c            | 272±21a             | 1436±54ab           | 1377±51ab           | 6.9±0.8c            | 190±17ab            | 0.6±0.1c            | 1353±86ab           | 1353±86ab                                                                                                     | 1353±86ab           | <0.0001 | <0.05   | <0.0005 | <0.0005 | <0.0001 | <0.05 | <0.005  | <0.0001 |
| Kidney COX4 (relative abundance)  | 1.00±0.23ab         | 0.75±0.15b          | 0.84±0.11b          | 0.94±0.17ab         | 175±10bc            | 1768±141a           | 1.52±0.09a          | 1.04±0.12ab         | 238±29a             | 56±4c               | 119±5c              | 1.15±0.11ab         | 1.15±0.11ab                                                                                                   | 1.15±0.11ab         | <0.05   | <0.05   | <0.0005 | <0.0005 | <0.0001 | <0.05 | <0.005  | <0.0001 |
| Kidney COX5b (relative abundance) | 1.00±0.08ab         | 0.83±0.10b          | 0.91±0.08b          | 0.95±0.06b          | 1952±131a           | 1703±127a           | 1.52±0.09a          | 1.10±0.15ab         | 1952±78a            | 1703±127a           | 1716±52a            | 1.13±0.17ab         | 1.13±0.17ab                                                                                                   | 1.13±0.17ab         | <0.05   | <0.0005 | <0.0005 | <0.0005 | <0.0001 | <0.05 | <0.005  | <0.0001 |
| LUNG                              |                     |                     |                     |                     |                     |                     |                     |                     |                     |                     |                     |                     |                                                                                                               |                     |         |         |         |         |         |       |         |         |
| Lung taurine (nmol/g)             | 9183±327a           | 3524±747b           | 10938±825a          | 10571±720a          | 10322±917a          | 10322±917a          | 10322±917a          | 10322±917a          | 2868±445b           | 11266±917ab         | 10820±655a          | 10820±655a          | 10820±655a                                                                                                    | 10820±655a          | <0.0001 | <0.0001 | <0.0001 | <0.0001 | <0.0001 | <0.05 | <0.005  | <0.0001 |
| Lung hypotaurine (nmol/g)         | 193±19b             | 6.8±0.8c            | 2.4±0.4c            | 213±26b             | 2.4±0.4c            | 272±21a             | 272±21a             | 272±21a             | 6.9±0.8c            | 190±17ab            | 0.6±0.1c            | 0.6±0.1c            | 0.6±0.1c                                                                                                      | 0.6±0.1c            | <0.0001 | <0.05   | <0.0005 | <0.0005 | <0.0001 | <0.05 | <0.005  | <0.0001 |
| Lung cysteine (nmol/g)            | 60±5cd              | 202±19ab            | 175±10bc            | 65±1cd              | 175±10bc            | 66±4cd              | 66±4cd              | 66±4cd              | 238±29a             | 56±4c               | 119±5c              | 119±5c              | 119±5c                                                                                                        | 119±5c              | <0.0001 | <0.05   | <0.0005 | <0.0005 | <0.0001 | <0.05 | <0.005  | <0.0001 |
| Lung glutathione (nmol/g)         | 1742±178a           | 1978±183a           | 1952±131a           | 1782±127a           | 1952±131a           | 1768±141a           | 1768±141a           | 1768±141a           | 1952±78a            | 1703±127a           | 1716±52a            | 1716±52a            | 1716±52a                                                                                                      | 1716±52a            | <0.0001 | <0.05   | <0.0005 | <0.0005 | <0.0001 | <0.05 | <0.005  | <0.0001 |
| Lung cystathionine (nmol/g)       | 2.7±0.3cd           | 7.4±0.7a            | 4.9±1.0b            | 2.9±0.2c            | 4.9±1.0b            | 1.8±0.1bc           | 1.8±0.1bc           | 1.8±0.1bc           | 9.6±1.1a            | 2.1±0.2c            | 4.2±0.4bc           | 4.2±0.4bc           | 4.2±0.4bc                                                                                                     | 4.2±0.4bc           | <0.0001 | <0.0005 | <0.0005 | <0.0005 | <0.0001 | <0.05 | <0.005  | <0.0001 |
| Lung lanthionine (nmol/g)         | 0.19±0.04bc         | 0.51±0.07a          | 0.24±0.03b          | 0.08±0.02c          | 0.24±0.03b          | 0.18±0.04bc         | 0.18±0.04bc         | 0.18±0.04bc         | 0.44±0.04a          | 0.08±0.01c          | 0.18±0.01bc         | 0.18±0.01bc         | 0.18±0.01bc                                                                                                   | 0.18±0.01bc         | <0.0001 | <0.0001 | <0.0001 | <0.0001 | <0.0001 | <0.05 | <0.005  | <0.0001 |
| Lung homocysteine (nmol/g)        | Too low to quantify                                                                                           | Too low to quantify | <0.05   | <0.05   | <0.05   | <0.05   | <0.05   | <0.05 | <0.05   | <0.05   |
| Lung methionine (nmol/g)          | 26±2b               | 31±3ab              | 39±2a               | 32±3ab              | 39±2a               | 34±4ab              | 34±4ab              | 34±4ab              | 36±3ab              | 33±3ab              | 36±4ab              | 36±4ab              | 36±4ab                                                                                                        | 36±4ab              | <0.05   | <0.05   | <0.05   | <0.05   | <0.05   | <0.05 | <0.05   | <0.05   |
| Lung serine (nmol/g)              | 182±11ab            | 228±15a             | 176±7bc             | 217±7ab             | 176±7bc             | 192±6abc            | 192±6abc            | 192±6abc            | 203±8abc            | 169±12c             | 170±15bc            | 170±15bc            | 170±15bc                                                                                                      | 170±15bc            | <0.05   | <0.05   | <0.05   | <0.05   | <0.05   | <0.05 | <0.05   | <0.05   |
| Lung glycine (nmol/g)             | 3096±130abc         | 3543±161a           | 2604±97cd           | 3403±119ab          | 2604±97cd           | 3204±58abc          | 3204±58abc          | 3204±58abc          | 3536±220a           | 2717±272bcd         | 2400±143d           | 2400±143d           | 2400±143d                                                                                                     | 2400±143d           | <0.0001 | <0.0001 | <0.1    | <0.0001 | <0.0001 | <0.05 | <0.0001 | <0.0001 |
| Lung alanine (nmol/g)             | 848±38a             | 849±58a             | 813±38a             | 900±43a             | 813±38a             | 921±22a             | 921±22a             | 921±22a             | 932±53a             | 860±48a             | 845±46a             | 845±46a             | 845±46a                                                                                                       | 845±46a             | <0.0001 | <0.0001 | <0.0001 | <0.0001 | <0.0001 | <0.05 | <0.0001 | <0.0001 |
| Lung COX4 (relative abundance)    | Too low to quantify                                                                                           | Too low to quantify | <0.0001 | <0.0001 | <0.0001 | <0.0001 | <0.0001 | <0.05 | <0.0001 | <0.0001 |
| Lung COX5b (relative abundance)   | Too low to quantify                                                                                           | Too low to quantify | <0.0001 | <0.0001 | <0.0001 | <0.0001 | <0.0001 | <0.05 | <0.0001 | <0.0001 |
| SERUM                             |                     |                     |                     |                     |                     |                     |                     |                     |                     |                     |                     |                     |                                                                                                               |                     |         |         |         |         |         |       |         |         |
| Serum taurine (nmol/ml)           | 479±67bc            | 57±15d              | 392±37c             | 745±96ab            | 392±37c             | 340±13c             | 340±13c             | 340±13c             | 26±5d               | 830±57a             | 780±95a             | 780±95a             | 780±95a                                                                                                       | 780±95a             | <0.0001 | <0.0001 | <0.0001 | <0.0001 | <0.0001 | <0.05 | <0.0001 | <0.0001 |
| Serum hypotaurine (nmol/ml)       | Not detected                                                                                                  | Not detected        | <0.0001 | <0.0001 | <0.0001 | <0.0001 | <0.0001 | <0.05 | <0.0001 | <0.0001 |
| Serum cysteine (nmol/ml)          | 103±7c              | 158±11ab            | 166±11ab            | 92±4c               | 166±11ab            | 92±7c               | 92±7c               | 92±7c               | 208±16a             | 88±5c               | 100±5c              | 100±5c              | 100±5c                                                                                                        | 100±5c              | <0.0001 | <0.0001 | <0.0001 | <0.0001 | <0.0001 | <0.05 | <0.0001 | <0.0001 |
| Serum glutathione (nmol/ml)       | 153±72a             | 170±24a             | 126±29a             | 167±26a             | 126±29a             | 166±30a             | 166±30a             | 166±30a             | 206±19a             | 233±46a             | 154±28a             | 154±28a             | 154±28a                                                                                                       | 154±28a             | <0.0001 | <0.0001 | <0.0001 | <0.0001 | <0.0001 | <0.05 | <0.0001 | <0.0001 |
| Serum cystathionine (nmol/ml)     | 1.1±0.1c            | 6.1±0.6ab           | 4.8±0.9b            | 1.3±0.2c            | 4.8±0.9b            | 1.7±0.2c            | 1.7±0.2c            | 1.7±0.2c            | 8.9±0.9a            | 1.9±0.2c            | 5.8±1.2b            | 5.8±1.2b            | 5.8±1.2b                                                                                                      | 5.8±1.2b            | <0.0001 | <0.0001 | <0.0001 | <0.0001 | <0.0001 | <0.05 | <0.0001 | <0.0001 |
| Serum lanthionine (nmol/ml)       | 0.06±0.01b          | 0.35±0.03a          | 0.33±0.04a          | 0.04±0.01b          | 0.33±0.04a          | 0.07±0.01b          | 0.07±0.01b          | 0.07±0.01b          | 0.49±0.04a          | 0.07±0.01b          | 0.32±0.07a          | 0.32±0.07a          | 0.32±0.07a                                                                                                    | 0.32±0.07a          | <0.0001 | <0.0001 | <0.0001 | <0.0001 | <0.0001 | <0.05 | <0.0001 | <0.0001 |
| Serum homocysteine (nmol/ml)      | 6.6±0.6a            | 1.2±0.1d            | 2.0±0.7cd           | 7.3±0.8a            | 2.0±0.7cd           | 4.3±0.4bc           | 4.3±0.4bc           | 4.3±0.4bc           | 1.3±0.1d            | 5.6±0.9ab           | 1.3±0.2d            | 1.3±0.2d            | 1.3±0.2d                                                                                                      | 1.3±0.2d            | <0.0001 | <0.0001 | <0.0001 | <0.0001 | <0.0001 | <0.05 | <0.0001 | <0.0001 |
| Serum methionine (nmol/ml)        | 50±4a               | 42±10a              | 65±5a               | 56±6a               | 65±5a               | 64±6a               | 64±6a               | 64±6a               | 62±3a               | 69±7a               | 63±5a               | 63±5a               | 63±5a                                                                                                         | 63±5a               | <0.0001 | <0.0001 | <0.0001 | <0.0001 | <0.0001 | <0.05 | <0.0001 | <0.0001 |
| Serum serine (nmol/ml)            | 141±10a             | 103±31a             | 158±9a              | 164±5a              | 158±9a              | 146±9a              | 146±9a              | 146±9a              | 143±6a              | 163±8a              | 139±15a             | 139±15a             | 139±15a                                                                                                       | 139±15a             | <0.0001 | <0.0001 | <0.0001 | <0.0001 | <0.0001 | <0.05 | <0.0001 | <0.0001 |
| Serum glycine (nmol/ml)           | 196±11abc           | 189±18bc            | 207±8abc            | 257±17a             | 207±8abc            | 200±16abc           | 200±16abc           | 200±16abc           | 149±6c              | 236±20ab            | 201±17abc           | 201±17abc           | 201±17abc                                                                                                     | 201±17abc           | <0.01   | <0.0001 | <0.0001 | <0.0001 | <0.0001 | <0.05 | <0.0001 | <0.0001 |
| Serum alanine (nmol/ml)           | 558±45ab            | 447±125ab           | 549±43ab            | 538±28ab            | 549±43ab            | 575±36ab            | 575±36ab            | 575±36ab            | 470±18b             | 661±53a             | 541±1ab             | 541±1ab             | 541±1ab                                                                                                       | 541±1ab             | <0.05   | <0.0001 | <0.0001 | <0.0001 | <0.0001 | <0.05 | <0.0001 | <0.0001 |
| URINE                             |                     |                     |                     |                     |                     |                     |                     |                     |                     |                     |                     |                     |                                                                                                               |                     |         |         |         |         |         |       |         |         |
| Thiosulfate (μmol/mg creatinine)  | 93±12c              | 419±21a             | 499±36a             | 99±14c              | 499±36a             | 110±14c             | 110±14c             | 110±14c             | 319±27b             | 119±29c             | 507±83a             | 507±83a             | 507±83a                                                                                                       | 507±83a             | <0.0001 | <0.0001 | <0.0005 | <0.0005 | <0.0001 | <0.05 | <0.0001 | <0.0001 |

\*Columns on the right give p-values for the main effects and their interactions as analyzed by a full-factorial three-way general linear model using JMP version 10 (SAS, Cary, NC). Cystathionine and lanthionine values were transformed to square root before statistical analysis.

†Each value is the mean±SEM for seven mice. The letters following each value within a row indicate that values not followed by the same letter were significantly different at p<0.05 according to post hoc comparisons among means made by Tukey's test.

G, genotype; N, null; W, wild-type; S, sex; F, female; M, male; D, diet; -, taurine-free diet; +, taurine-supplemented diet.

CDO, cysteine dioxygenase; COX, cytochrome c oxidase.
