# Supplementary material
Source: PubMed Central journal article supplement (PMC3791055)
Supplement: Supp_Table2.pdf [file Supp_Table2.pdf]

SUPPLEMENTARY TABLE S2. DETAILS OF QUANTIFICATION AND STATISTICAL ANALYSIS OF WESTERN BLOTS OF ENZYMES INVOLVED IN CYSTEINE AND SULFUR METABOLISM

| Tissue        | G/D/S group                |      |      |     |     |      |     |     |                      |                      | Significance level for main effects and two-way interactions as analyzed by a general linear model* |                     |                     |     |
|---------------|----------------------------|------|------|-----|-----|------|-----|-----|----------------------|----------------------|-----------------------------------------------------------------------------------------------------|---------------------|---------------------|-----|
|               | W-F                        | N-F  | W+F  | N+F | W-M | N-M  | W+M | N+M | G                    | D                    | S                                                                                                   | G×S                 | G×D                 | D×S |
| LIVER         |                            |      |      |     |     |      |     |     |                      |                      |                                                                                                     |                     |                     |     |
| CDO           | 1.0 <sup>†</sup>           | 0    | 0.6  | 0   | 0.9 | 0    | 0.9 | 0   | F(1,7)=92, p<0.0001  | F(1,4)=43, p=0.0028  | F(1,4)=18, p=0.0129                                                                                 | F(1,4)=29, p=0.0056 | F(1,4)=44, p=0.0027 |     |
| CSD (sqrt)    | 1.0                        | 19.3 | 0.3  | 0.3 | 0.5 | 11.3 | 0.3 | 0.5 | F(1,4)=33, p=0.0046  |                      |                                                                                                     |                     |                     |     |
| ADO           | 1.0                        | 0.9  | 0.8  | 0.6 | 0.6 | 0.6  | 0.9 | 0.8 | G(1,4)=7, p=0.0570   |                      |                                                                                                     |                     |                     |     |
| SLC6A6 (sqrt) | 1.0                        | 13.8 | 0.3  | 0.5 | 1.3 | 12.4 | 0.7 | 1.1 | F(1,4)=116, p=0.0004 | F(1,4)=151, p<0.0003 | F(1,3)=81, p=0.0029                                                                                 | F(1,4)=87, p<0.0007 | F(1,3)=9, p=0.058   |     |
| CBS           | 1.0                        | 1.1  | 1.0  | 0.9 | 0.8 | 0.8  | 0.8 | 0.7 |                      |                      |                                                                                                     |                     |                     |     |
| CTH           | 1.0                        | 1.0  | 0.9  | 0.9 | 0.9 | 0.9  | 1.1 | 0.9 | F(1,6)=8, p=0.0300   |                      |                                                                                                     |                     |                     |     |
| MPST          | 1.0                        | 0.9  | 1.0  | 0.7 | 0.8 | 0.7  | 1.0 | 0.7 |                      |                      |                                                                                                     |                     |                     |     |
| SQRDL         | 1.0                        | 1.1  | 1.0  | 0.8 | 1.1 | 1.1  | 1.4 | 1.0 |                      | F(1,5)=2, p=0.087    | F(1,5)=4, p=0.017                                                                                   |                     |                     |     |
| ETHE1         | 1.0                        | 1.1  | 1.0  | 0.8 | 0.7 | 0.9  | 0.7 | 0.6 |                      | F(1,6)=31, p=0.0014  |                                                                                                     |                     |                     |     |
| TST           | 1.0                        | 1.1  | 1.2  | 1.0 | 0.8 | 0.7  | 0.7 | 0.6 |                      | F(1,3)=2, p=0.092    | F(1,3)=7, p=0.0052                                                                                  |                     |                     |     |
| SUOX          | 1.0                        | 1.2  | 1.1  | 0.8 | 0.7 | 0.8  | 0.8 | 0.6 |                      |                      |                                                                                                     |                     |                     |     |
| PANCREAS      |                            |      |      |     |     |      |     |     |                      |                      |                                                                                                     |                     |                     |     |
| CDO           | 1.0                        | 0    | 0.85 | 0   | 2.1 | 0    | 3.0 | 0   | F(1,4)=58, p=0.0016  | F(1,4)=13, p=0.023   |                                                                                                     |                     |                     |     |
| CSD           | Nonspecific-not quantified |      |      |     |     |      |     |     |                      |                      |                                                                                                     |                     |                     |     |
| ADO           | 1.0                        | 1.4  | 1.3  | 1.1 | 1.0 | 0.9  | 1.0 | 1.2 |                      |                      |                                                                                                     |                     |                     |     |
| SLC6A6        | Nonspecific-not quantified |      |      |     |     |      |     |     |                      |                      |                                                                                                     |                     |                     |     |
| CBS           | 1.0                        | 1.3  | 1.1  | 1.3 | 1.0 | 1.3  | 1.1 | 1.5 | F(1,5)=45, p=0.0011  | F(1,5)=5, p=0.076    |                                                                                                     |                     |                     |     |
| CTH           | 1.0                        | 1.2  | 1.0  | 1.2 | 1.4 | 1.3  | 1.2 | 1.3 |                      |                      |                                                                                                     |                     |                     |     |
| MPST          | 1.0                        | 1.4  | 0.8  | 0.8 | 0.8 | 1.0  | 0.7 | 0.9 |                      |                      |                                                                                                     |                     |                     |     |
| SQRDL         | Nonspecific-not quantified |      |      |     |     |      |     |     |                      |                      |                                                                                                     |                     |                     |     |
| ETHE1         | 1.0                        | 1.2  | 0.9  | 0.9 | 0.9 | 0.9  | 0.7 | 0.7 | F(1,4)=21, p=0.0099  | F(1,4)=21, p=0.0099  |                                                                                                     |                     |                     |     |
| TST           | 1.0                        | 1.5  | 0.8  | 1.2 | 0.9 | 1.0  | 0.7 | 1.1 | F(1,5)=15, p=0.011   | F(1,5)=6, p=0.062    |                                                                                                     |                     |                     |     |
| SUOX          | Too low to quantify        |      |      |     |     |      |     |     |                      |                      |                                                                                                     |                     |                     |     |
| KIDNEY        |                            |      |      |     |     |      |     |     |                      |                      |                                                                                                     |                     |                     |     |
| CDO           | 1.0                        | 0    | 0.5  | 0   | 2.2 | 0    | 2.2 | 0   | F(1,4)=139, p=0.0003 | F(1,2)=25, p=0.038   | F(1,4)=34, p=0.0044                                                                                 | F(1,2)=9, p=0.096   | F(1,2)=49, p=0.020  |     |
| CSD           | 1                          | 1.0  | 1.1  | 1.0 | 2.0 | 2.1  | 1.8 | 1.7 |                      |                      |                                                                                                     |                     |                     |     |
| ADO           | 1.0                        | 0.8  | 0.7  | 0.8 | 1.1 | 1.0  | 1.1 | 1.1 |                      |                      |                                                                                                     |                     |                     |     |
| SLC6A6        | 1.0                        | 0.8  | 0.8  | 0.8 | 1.5 | 1.5  | 1.5 | 1.4 |                      |                      |                                                                                                     |                     |                     |     |
| CBS           | 1.0                        | 1.0  | 1.0  | 1.0 | 2.4 | 2.0  | 2.3 | 2.1 | F(1,4)=18, p=0.0132  | F(1,6)=125, p<0.0001 | F(1,4)=1152, p<0.0001                                                                               | F(1,4)=18, p=0.0132 | F(1,4)=8, p=0.047   |     |
| CTH           | 1.0                        | 0.8  | 0.9  | 0.8 | 1.0 | 0.7  | 0.8 | 0.8 | F(1,4)=18, p=0.013   |                      |                                                                                                     |                     |                     |     |
| MPST          | 1.0                        | 1.3  | 0.9  | 0.8 | 1.2 | 1.0  | 1.2 | 1.1 |                      |                      |                                                                                                     |                     |                     |     |
| SQRDL         | Too low to quantify        |      |      |     |     |      |     |     |                      |                      |                                                                                                     |                     |                     |     |
| ETHE1         | 1.0                        | 1.0  | 0.9  | 0.9 | 1.4 | 1.1  | 1.1 | 1.1 |                      |                      |                                                                                                     |                     |                     |     |
| ETHE1         | 1.0                        | 0.8  | 0.8  | 0.7 | 0.9 | 0.9  | 1.1 | 1.3 |                      |                      |                                                                                                     |                     |                     |     |
| SUOX          | 1.0                        | 0.9  | 1.0  | 0.9 | 1.3 | 1.3  | 1.2 | 1.2 |                      |                      |                                                                                                     |                     |                     |     |
| LUNG          |                            |      |      |     |     |      |     |     |                      |                      |                                                                                                     |                     |                     |     |
| CDO           | 1.0                        | 0    | 0.8  | 0   | 0.9 | 0    | 0.8 | 0   | F(1,7)=251, p<0.0001 |                      |                                                                                                     |                     |                     |     |
| CSD           | 1.0                        | 1.7  | 1.5  | 1.3 | 1.1 | 1.4  | 0.9 | 1.1 |                      |                      |                                                                                                     |                     |                     |     |
| ADO           | 1.0                        | 0.8  | 0.8  | 1.0 | 0.8 | 0.9  | 0.8 | 1.0 |                      |                      |                                                                                                     |                     |                     |     |
| SLC6A6        | 1.0                        | 1.4  | 1.2  | 1.3 | 0.9 | 1.0  | 1.0 | 1.1 | F(1,5)=7, p=0.050    | F(1,5)=11, p=0.0213  | F(1,3)=15, p=0.030                                                                                  |                     |                     |     |
| CBS           | 1.0                        | 0.9  | 0.9  | 1.3 | 0.6 | 0.7  | 0.8 | 1.0 |                      |                      |                                                                                                     |                     |                     |     |
| CTH           | 1.0                        | 1.1  | 1.2  | 1.1 | 1.1 | 0.9  | 1.1 | 0.8 |                      |                      |                                                                                                     |                     |                     |     |
| MPST          | 1.0                        | 1.4  | 0.9  | 1.3 | 0.8 | 1.1  | 1.0 | 1.0 | F(1,5)=5, p=0.0842   |                      |                                                                                                     |                     |                     |     |
| SQRDL         | 1.0                        | 1.3  | 0.8  | 1.4 | 0.8 | 1.2  | 0.8 | 1.2 | F(1,5)=6, p=0.059    |                      |                                                                                                     |                     |                     |     |
| ETHE1         | 1.0                        | 1.3  | 0.9  | 0.9 | 0.9 | 0.7  | 0.7 | 0.7 | F(1,5)=10, p=0.025   |                      |                                                                                                     |                     |                     |     |
| TST           | 1.0                        | 1.5  | 1.1  | 1.8 | 1.2 | 1.9  | 1.5 | 1.9 | F(1,4)=17, p=0.014   |                      |                                                                                                     |                     |                     |     |
| SUOX          | 1.0                        | 1.2  | 1.1  | 1.7 | 1.0 | 1.2  | 1.0 | 0.8 |                      |                      |                                                                                                     |                     |                     |     |

\*Columns on the right give p-values for the main effects and their interactions as analyzed by a general linear model for the three categorical variables (G [N, W]; taurine supplementation [-, no taurine; +, with taurine], and S [F, M]) and some two-way interactions using JMP, version 10 (SAS, Cary, NC). Effect tests with F values significant at p<0.1 are given in the table. Values for liver CSD and SLC6A6 were transformed to square roots before statistical analysis.

<sup>†</sup>Western blots were quantified and normalized by actin. All values represent the intensity of the band for a pooled sample that contained equal amounts of tissue protein from each of the seven mice in the experimental group. All values are expressed relative to the intensity of the band for the WF group, which was set as 1.0.

ADO, 2-aminoethanethiol dioxygenase; CBS, cystathionine β-synthase; CSD, cysteine sulfinate decarboxylase; CTH, cystathionine γ-lyase; ETHE1, ethylmalonic encephalopathy 1; MPST, 3-mercaptopyruvate sulfur transferase; SLC6A6, solute carrier 6A6 (taurine transporter); SQRDL, sulfide quinone reductase; SUOX, sulfite oxidase; TST, thiosulfate sulfur transferase.

G, genotype; N, null; W, wild-type; S, sex; F, female; M, male; D, diet; -, taurine-free diet; +, taurine-supplemented diet.
